# Supplementary material for: Beyond the Classical Electron‐Sharing and Dative Bond Picture: Case of the Spin‐Polarized Bond
Source: PubMed Central journal article supplement (PMC7839703; doi:10.1002/anie.202010948), 2020-11-11
Supplement: ANIE-60-1498-s001.pdf [file ANIE-60-1498-s001.pdf]

## Supporting Information

### **Beyond the Classical Electron-Sharing and Dative Bond Picture: The Case of Spin-Polarized Bond**

*Pedro Salvador,\* Eva Vos, Inés Corral,\* and Diego M. Andrada\**

anie\_202010948\_sm\_miscellaneous\_information.pdf

## Methods

All geometries were optimized with symmetry constraints within the DFT (density functional theory) framework using a series of functionals: BP86,<sup>[1]</sup> PBE,<sup>[2]</sup> B3LYP<sup>[3]</sup> TPSS,<sup>[4]</sup> M06L,<sup>[5]</sup> X3LYP,<sup>[6]</sup> PBE0,<sup>[2, 7]</sup> mPW1K,<sup>[8]</sup> BHHLYP,<sup>[9]</sup> TPSSh,<sup>[4, 10]</sup> M06,<sup>[11]</sup> M06-2X,<sup>[11]</sup> CAM-B3LYP,<sup>[12]</sup> wB97x,<sup>[13]</sup> B2PLYP,<sup>[14]</sup> mPW2PLYP,<sup>[15]</sup> PBE0DH,<sup>[16]</sup> and PBEQIDH.<sup>[17]</sup> The Dunning's basis set aug-cc-pVTZ (AVTZ) was selected for H, B, N, Na atoms.<sup>[18]</sup> These calculations were performed using the Gaussian 16 C01 software suite.<sup>[19]</sup> The stationary points were located with the Berny algorithm<sup>[20]</sup> using redundant internal coordinates. Analytical Hessians were computed to determine the nature of stationary points<sup>[21]</sup> and to calculate thermal corrections and entropy effects using the standard statistical-mechanics relationships for an ideal gas.<sup>[22]</sup> The optimization at HF/AVTZ, MP2/AVTZ, CCSD/AVTZ, and CCSD(T)/AVTZ calculations were performed by employing MOLPRO 2019.1<sup>[23]</sup> software program package.

Multiconfigurational calculations for the lowest singlet and triplet states were undertaken using the SS-CASPT2//SS-CASPT2 protocol, that is SS-CASPT2 energies on SS-CASPT2 optimized geometries, as implemented the 1.2.2 version of Bagel.<sup>[24]</sup> SS-CASSCF wave functions with different active spaces were employed as a reference. The aug-cc-pVQZ (AVQZ) basis with the auxiliary cc-pVQZ-JKFIT basis set for density fitting were employed.

The reference CASSCF wave function for  $\text{NaBH}_3^-$  includes 8 electrons in 8 orbitals as shown in Figure S1. The selected active space consists of the  $3s$  orbital of the Na, the  $2s$  and  $2p$  boron orbitals and the  $1s$  orbitals of the three hydrogen atoms. For  $\text{BH}_4^-$ , the active space, shown in Figure S2, contains the  $2s$  and the three  $2p$  orbitals of boron and the  $1s$  orbitals of each hydrogen atom. In contrast to the former systems, the (12,12) active space of  $\text{NH}_3\text{BH}_3$  incorporates the  $2s$  and  $2p$  nitrogen orbitals, which replace the orbitals of Na, See Figure S3.

The CASPT2/aug-cc-pVQZ dissociation curve for  $\text{NaBH}_3^-$ , see Figure S4, was calculated using the external interface included in Gaussian16.<sup>[4]</sup> This interface allows performing relaxed scans using CASPT2 gradients, by linking Gaussian to Bagel. Interestingly, in contrast with monoconfigurational methods which only optimize the global  $C_s$  triplet minimum, CASPT2 localizes an additional triplet minimum of  $C_{3v}$  symmetry, 7.7 kcal/mol over the singlet global minimum, underscoring the multireference character of this system.

The analysis of the CASSCF wave function along the dissociation curve reveals the multiconfigurational character of the system not only for significantly stretched Na-B bond

distances, but also at the equilibrium geometry. In fact, Truhlar's  $M$  diagnostic calculated half way to dissociation ( $d_{\text{Na-B}}=4.5 \text{ \AA}$ ) and for the dissociated system ( $d_{\text{Na-B}}=7 \text{ \AA}$ ) respectively amounts to 0.17 and 0.15, which correspond to strongly multiconfigurational situations according to the literature.<sup>[25]</sup> Even more correlated is the electronic structure of the system in the proximity of the equilibrium position ( $d_{\text{Na-B}}=2.75 \text{ \AA}$ ) where  $M$  was predicted to amount to  $M=0.32$ .

For the calculation of bond orders and electronic spin calculations, single-point CASSCF/AVTZ calculations on the  $\text{NaBH}_3^-$ ,  $\text{BH}_4^-$  and  $\text{NH}_3\text{BH}_3$  CCSD(T)/AVTZ optimized structures were performed with pySCF.<sup>[26]</sup> The first- and second-order reduced density matrices necessary for the calculation of the local spin have been processed with APOST3D.<sup>[27]</sup> For  $\text{BH}_4^-$ , and  $\text{NaBH}_3^-$ , we used the (8,8) active spaces described above and in Figures S1-S2. For  $\text{NH}_3\text{BH}_3$ , an active space of 12 electrons in 12 orbitals has been used, including eight E orbitals and eight electrons associated to the B-H and N-H bonds, and four  $A_1$  orbitals and four electrons for the B-N interaction.

The energy decomposition analysis (EDA) with the natural orbitals for chemical valence (NOCV) calculations on the optimized CCSD(T)/AVTZ geometries were carried out with ADF 2019.103.<sup>[28]</sup> The basis sets for all elements have quadruple- $\zeta$  quality augmented by four sets of polarizations functions. The level of theory used were BP86/QZ4P, M06L/QZ4P, and PBE0/QZ4P.<sup>[29]</sup> Scalar relativistic effects have been incorporated by applying the zeroth-order regular approximation (ZORA).<sup>[30]</sup>

**Table S1.** Triplet ( $\Delta E_T$ ) and BS ( $\Delta E_{BS}$ ) electronic energies relative to the CS solution (in kcal/mol) and Na-B equilibrium distance ( $R_e$  in Å) for singlet (CS), triplet (T), and singlet open shell (BS) states of  $\text{NaBH}_3^-$  at different levels of theory.  $\langle S^2 \rangle$  and diradical character ( $n_{\text{rad}}$ ).<sup>a</sup>

| Method <sup>b</sup> |               | CS ( $C_{3v}$ ) |              | T ( $C_s$ ) |                 | BS ( $C_{3v}$ ) |      | $\langle S^2 \rangle$ | $n_{\text{rad}}$ (%) |
|---------------------|---------------|-----------------|--------------|-------------|-----------------|-----------------|------|-----------------------|----------------------|
|                     |               | $R_e$           | $\Delta E_T$ | $R_e$       | $\Delta E_{BS}$ | $R_e$           |      |                       |                      |
| HF                  |               | 4.865           | -7.4         | 2.557       | -7.8            | 2.797           | 0.89 | 67                    |                      |
| MP2                 |               | 2.763           | -3.9         | 2.581       | -4.8            | 2.710           | 0.90 | 68 <sup>c</sup>       |                      |
| CCSD                |               | 2.794           | 1.6          | 2.574       | -0.7            | 2.742           | 0.90 | 68 <sup>c</sup>       |                      |
| CCSD(T)             |               | 2.719           | 5.2          | 2.580       |                 |                 |      | 0.14 <sup>d</sup>     |                      |
| CASSCF(8,8)         |               | 2.862           | 5.0          | 2.556       |                 |                 |      | 56 <sup>e</sup>       |                      |
| CASPT2(8,8)         |               | 2.666           | 4.3          | 2.552       |                 |                 |      | 56 <sup>e</sup>       |                      |
| BP86                | GGA           | 2.707           | 6.3          | 2.579       | -0.4            | 2.702           | 0.30 | 16                    |                      |
| PBE                 | GGA           | 2.690           | 6.0          | 2.562       | -0.6            | 2.6801          | 0.35 | 19                    |                      |
| TPSS                | meta-GGA      | 2.757           | 5.3          | 2.553       | -1.4            | 2.726           | 0.47 | 27                    |                      |
| M06L                | meta-GGA      | 2.699           | 1.5          | 2.482       | -2.9            | 2.668           | 0.71 | 46                    |                      |
| B3LYP               | Hybrid GGA    | 2.763           | 6.3          | 2.565       | -0.5            | 2.736           | 0.35 | 19                    |                      |
| X3LYP               | Hybrid GGA    | 2.759           | 6.4          | 2.557       | -0.5            | 2.730           | 0.35 | 19                    |                      |
| PBE0                | Hybrid GGA    | 2.743           | 1.7          | 2.536       | -2.8            | 2.681           | 0.61 | 38                    |                      |
| mPW1K               | Hybrid GGA    | 2.760           | 1.1          | 2.543       | -3.1            | 2.692           | 0.63 | 39                    |                      |
| BHLYP               | Hybrid GGA    | 2.862           | 2.7          | 2.533       | -2.3            | 2.729           | 0.59 | 36                    |                      |
| TPPSh               | Hybrid mGGA   | 2.774           | 3.9          | 2.543       | -2.1            | 2.723           | 0.54 | 32                    |                      |
| M06                 | Hybrid mGGA   | 2.811           | 5.6          | 2.547       | -0.4            | 2.722           | 0.43 | 25                    |                      |
| M06-2X              | Hybrid mGGA   | 2.698           | 3.9          | 2.536       | -3.8            | 2.701           | 0.55 | 33                    |                      |
| CAM-B3LYP           | RS hybrid     | 2.745           | 2.1          | 2.529       | -2.9            | 2.674           | 0.61 | 38                    |                      |
| wB97x               | RS hybrid     | 2.828           | 0.8          | 2.515       | -3.7            | 2.668           | 0.63 | 39                    |                      |
| B2PLYP              | Double Hybrid | 2.753           | -0.4         | 2.562       | -4.1            | 2.732           | 0.70 | 45                    |                      |
| mPW2PLYP            | Double Hybrid | 2.759           | 0.0          | 2.553       | -3.9            | 2.722           | 0.69 | 44                    |                      |
| PBE0DH              | Double Hybrid | 2.767           | -2.8         | 2.528       | -5.7            | 2.679           | 0.75 | 50                    |                      |
| PBEQIDH             | Double Hybrid | 2.766           | -6.4         | 2.535       | -8.2            | 2.683           | 0.89 | 67                    |                      |

<sup>a</sup> computed from  $\langle S^2 \rangle$  as described in [31].

<sup>b</sup> in combination with the AVTZ, except for CASSCF where the AVQZ was employed.

<sup>c</sup> from  $\langle S^2 \rangle$  of the HF wavefunction.

<sup>d</sup> largest  $t_2$  amplitude.

<sup>e</sup> derived from the CI coefficient of the doubly-excited configuration.

**Table S2.** Electronic energies (in Hartrees) for singlet (CS), triplet (T), and singlet open shell (BS) states of  $\text{NaBH}_3^-$ .

| Method                | CS ( $C_{3v}$ ) | T ( $C_s$ )  | BS ( $C_{3v}$ ) |
|-----------------------|-----------------|--------------|-----------------|
| HF/aug-cc-pVTZ        | -188.2556577    | -188.2674803 | -188.2680566    |
| MP2/aug-cc-pVTZ       | -188.4014534    | -188.4075964 | -188.4090271    |
| CCSD/aug-cc-pVTZ      | -188.4323077    | -188.42972   | -188.4333956    |
| CCSD(T)/aug-cc-pVTZ   | -188.4430112    | -188.4347851 | --              |
| BP86/aug-cc-pVTZ      | -188.9523477    | -188.9422874 | -188.9529793    |
| PBE/aug-cc-pVTZ       | -188.7750556    | -188.7655621 | -188.7759658    |
| TPSS/aug-cc-pVTZ      | -188.9702435    | -188.9618539 | -188.9724599    |
| M06L/aug-cc-pVTZ      | -188.9195959    | -188.9172064 | -188.9241653    |
| B3LYP/aug-cc-pVTZ     | -188.9688797    | -188.9588047 | -188.9697395    |
| X3LYP/aug-cc-pVTZ     | -188.9126212    | -188.9023772 | -188.9134973    |
| PBE0/aug-cc-pVTZ      | -188.7930286    | -188.7903253 | -188.7974385    |
| mPW1K/aug-cc-pVTZ     | -188.9241779    | -188.9224379 | -188.9290925    |
| BHLYP/aug-cc-pVTZ     | -188.9085799    | -188.9043136 | -188.9122205    |
| TPPSh/aug-cc-pVTZ     | -188.958564     | -188.9522839 | -188.9619671    |
| M06/aug-cc-pVTZ       | -188.9013114    | -188.8923961 | -188.9019466    |
| M06-2X/aug-cc-pVTZ    | -188.892193     | -188.8859512 | -188.8981801    |
| CAM-B3LYP/aug-cc-pVTZ | -188.9049954    | -188.9016208 | -188.90965      |
| wB97x/aug-cc-pVTZ     | -188.90736      | -188.9060982 | -188.9131892    |
| B2PLYP/aug-cc-pVTZ    | -188.7304605    | -188.7311592 | -188.7369521    |
| mPW2PLYP/aug-cc-pVTZ  | -188.74344      | -188.7434972 | -188.7496474    |
| PBE0DH/aug-cc-pVTZ    | -188.7368426    | -188.7413625 | -188.7458625    |
| PBEQIDH/aug-cc-pVTZ   | -188.6259554    | -188.636177  | -188.6389847    |

**Table S3.** CASSCF Configuration Interactions (CI) vector computed for  $\text{BH}_4^-$ ,  $\text{NH}_3\text{BH}_3$ , and  $\text{NaBH}_3^-$  at the equilibrium structure.

| $\text{BH}_4^-$ |         | $\text{NH}_3\text{BH}_3$ |         | $\text{NaBH}_3^-$ |         |
|-----------------|---------|--------------------------|---------|-------------------|---------|
| Configuration   | CI      | Configuration            | CI      | Configuration     | CI      |
| (22220000)      | 0.9804  | (222222000000)           | -0.9714 | (22220000)        | 0.9009  |
| (22200200)      | -0.0594 | (202222200000)           | 0.0506  | (22202000)        | -0.3963 |
| (20220002)      | -0.0558 |                          |         | (22020020)        | -0.0522 |
| (22020020)      | -0.0505 |                          |         | (20220002)        | -0.0522 |

**Table S4.** NBO and AIM charges (Q (E), E = H, NH<sub>3</sub>, Na), atomic spin density ( $\rho_s$ ), Wiberg Bond Order (WBO<sub>NBO</sub>), AIM Delocalization Index (DI<sub>AIM</sub>), Local Spins ( $\langle S^2 \rangle$ ), EDA Orbital Interaction ( $\Delta E_{orb}$  in kcal/mol) and electron density values at the E-B (3,-1) point ( $\rho_{BCP}$ ) of BH<sub>4</sub><sup>-</sup>, NH<sub>3</sub>BH<sub>3</sub>, and CS and BS NaBH<sub>3</sub><sup>-</sup> at BP86/AVTZ.<sup>a</sup>

|                                                 | BH <sub>4</sub> <sup>-</sup> | NH <sub>3</sub> BH <sub>3</sub> | NaBH <sub>3</sub> <sup>-</sup> (CS) | NaBH <sub>3</sub> <sup>-</sup> (BS) |
|-------------------------------------------------|------------------------------|---------------------------------|-------------------------------------|-------------------------------------|
| Q(E) <sub>NBO</sub> / Q(B) <sub>NBO</sub>       | -0.05/-0.79                  | +0.38/-0.25                     | -0.25/-0.51                         | -0.23/-0.54                         |
| $\rho_s(E)_{NBO} / \rho_s(E)_{AIM}$             |                              |                                 |                                     | 0.46 / 0.42                         |
| Q(E) <sub>AIM</sub> / Q(B) <sub>AIM</sub>       | -0.65/1.61                   | 0.08/1.76                       | -0.22/1.39                          | -0.20/1.36                          |
| $\rho_{BCP}$                                    | 0.15                         | 0.11                            | 0.014                               | 0.014                               |
| WBO <sub>NBO</sub> / DI <sub>AIM</sub>          | 1.00/0.58                    | 0.66/0.36                       | 0.93/0.47                           | 0.73/0.39                           |
| $\langle S^2 \rangle_E / \langle S^2 \rangle_B$ |                              |                                 |                                     | 0.20/0.11                           |
| $\Delta E_{orb}(E \bullet + \bullet B)$         | -100.7                       | -257.9                          | -18.9                               | -19.5                               |
| $\Delta E_{orb}(E : + B)$                       | -154.7                       | -77.9                           | -39.0                               | -39.6                               |

<sup>a</sup> on CCSD(T)/AVTZ structures.

**Table S5.** NBO and AIM charges (Q (E), E = H, NH<sub>3</sub>, Na), atomic spin density ( $\rho_s$ ), Wiberg Bond Order (WBO<sub>NBO</sub>), AIM Delocalization Index (DI<sub>AIM</sub>), Local Spins ( $\langle S^2 \rangle$ ), EDA Orbital Interaction ( $\Delta E_{orb}$  in kcal/mol), and electron density values at the E-B (3,-1) point ( $\rho_{BCP}$ ) of BH<sub>4</sub><sup>-</sup>, NH<sub>3</sub>BH<sub>3</sub>, and CS and BS NaBH<sub>3</sub><sup>-</sup> at M06L/AVTZ.<sup>a</sup>

|                                                 | BH <sub>4</sub> <sup>-</sup> | NH <sub>3</sub> BH <sub>3</sub> | NaBH <sub>3</sub> <sup>-</sup> (CS) | NaBH <sub>3</sub> <sup>-</sup> (BS) |
|-------------------------------------------------|------------------------------|---------------------------------|-------------------------------------|-------------------------------------|
| Q(E) <sub>NBO</sub> / Q(B) <sub>NBO</sub>       | -0.09/-0.65                  | 0.36/-0.15                      | -0.31/-0.38                         | -0.18/-0.49                         |
| $\rho_s(E)_{NBO} / \rho_s(E)_{AIM}$             |                              |                                 |                                     | 0.68 / 0.67                         |
| Q(E) <sub>AIM</sub> / Q(B) <sub>AIM</sub>       | -0.70/1.78                   | 0.08/1.88                       | -0.26/1.54                          | -0.20/1.46                          |
| $\rho$                                          | 0.15                         | 0.10                            | 0.013                               | 0.013                               |
| WBO <sub>NBO</sub> / DI <sub>AIM</sub>          | 0.99/0.53                    | 0.64/0.33                       | 0.90/0.43                           | 0.49/0.25                           |
| $\langle S^2 \rangle_E / \langle S^2 \rangle_B$ |                              |                                 |                                     | 0.50/0.27                           |
| $\Delta E_{orb}(E \bullet + \bullet B)$         | -106.6                       | -270.0                          | -22.1                               | -24.8                               |
| $\Delta E_{orb}(E : + B)$                       | -153.2                       | -70.4                           | -38.2                               | -41.0                               |

<sup>a</sup> on CCSD(T)/AVTZ structures.

**Table S6.** Energy decomposition analysis (EDA) of  $\text{NaBH}_3^-$  (CS),  $\text{NaBH}_3^-$  (BS),  $\text{BH}_4^-$  and  $\text{NH}_3\text{BH}_3$  at the BP86/QZ4P level of theory.<sup>a</sup> Energy values are given in kcal/mol.

| (NaBH <sub>3</sub> ) <sup>-</sup> Singlet closed-shell |                                                                                                |                                                                                                                          |                                                                                                                            |
|--------------------------------------------------------|------------------------------------------------------------------------------------------------|--------------------------------------------------------------------------------------------------------------------------|----------------------------------------------------------------------------------------------------------------------------|
|                                                        | Na <sup>-</sup> (s <sup>2</sup> ); BH <sub>3</sub> (A <sub>1</sub> <sup>0</sup> )              | Na(s <sup>1</sup> ); BH <sub>3</sub> <sup>-</sup> (A <sub>1</sub> <sup>1</sup> )                                         | Na <sup>+</sup> (s <sup>0</sup> ); BH <sub>3</sub> <sup>2-</sup> (A <sub>1</sub> <sup>2</sup> )                            |
| $\Delta E_{int}$                                       | -22.3                                                                                          | -30.7                                                                                                                    | -280.9                                                                                                                     |
| $\Delta E_{Pauli}$                                     | 33.7                                                                                           | 28.6                                                                                                                     | 67.3                                                                                                                       |
| $\Delta E_{elstat}^b$                                  | -17.0 (30.4%)                                                                                  | -40.5(68.2%)                                                                                                             | -287.7(82.6%)                                                                                                              |
| $\Delta E_{orb}^b$                                     | -39.0 (69.6%)                                                                                  | <b>-18.9</b> (31.8%)                                                                                                     | -60.5(17.4%)                                                                                                               |
| $\Delta E_{prep}$                                      | 1.2                                                                                            | 9.6                                                                                                                      | 259.9                                                                                                                      |
| $D_e^{c,d}$                                            | 21.1                                                                                           | 21.1                                                                                                                     | 21.1                                                                                                                       |
| (NaBH <sub>3</sub> ) <sup>-</sup> Broken Symmetry      |                                                                                                |                                                                                                                          |                                                                                                                            |
|                                                        | Na <sup>-</sup> (s <sup>2</sup> ); BH <sub>3</sub> (A <sub>1</sub> <sup>0</sup> )              | Na(s <sup>1</sup> ); BH <sub>3</sub> <sup>-</sup> (A <sub>1</sub> <sup>1</sup> )                                         | Na <sup>+</sup> (s <sup>0</sup> ); BH <sub>3</sub> <sup>2-</sup> (A <sub>1</sub> <sup>2</sup> )                            |
| $\Delta E_{int}$                                       | -22.9                                                                                          | -31.3                                                                                                                    | -281.6                                                                                                                     |
| $\Delta E_{Pauli}$                                     | 33.7                                                                                           | 28.6                                                                                                                     | 67.3                                                                                                                       |
| $\Delta E_{elstat}^b$                                  | -17.0(30.0%)                                                                                   | -40.5(67.5%)                                                                                                             | -287.7(82.5%)                                                                                                              |
| $\Delta E_{orb}^b$                                     | -39.6(70.0%)                                                                                   | <b>-19.5</b> (32.5%)                                                                                                     | -61.1(17.5%)                                                                                                               |
| $\Delta E_{prep}$                                      | 1.2                                                                                            | 9.6                                                                                                                      | 259.9                                                                                                                      |
| $D_e^{c,d}$                                            | 21.7                                                                                           | 21.7                                                                                                                     | 21.7                                                                                                                       |
| BH <sub>4</sub> <sup>-</sup>                           |                                                                                                |                                                                                                                          |                                                                                                                            |
|                                                        | H <sup>-</sup> (s <sup>2</sup> ); BH <sub>3</sub> (A <sub>1</sub> <sup>0</sup> )               | H(s <sup>1</sup> ); BH <sub>3</sub> <sup>-</sup> (A <sub>1</sub> <sup>1</sup> )                                          | H <sup>+</sup> (s <sup>0</sup> ); BH <sub>3</sub> <sup>2-</sup> (A <sub>1</sub> <sup>2</sup> )                             |
| $\Delta E_{int}$                                       | -101.7                                                                                         | -102.6                                                                                                                   | -535.7                                                                                                                     |
| $\Delta E_{Pauli}$                                     | 137.9                                                                                          | 39.2                                                                                                                     | 0.0                                                                                                                        |
| $\Delta E_{elstat}^b$                                  | -84.9(35.4%)                                                                                   | -41.1(29.0%)                                                                                                             | -245.8(45.9%)                                                                                                              |
| $\Delta E_{orb}^b$                                     | -154.7(64.6%)                                                                                  | <b>-100.7</b> (71.0%)                                                                                                    | -289.9(54.1%)                                                                                                              |
| $\Delta E_{prep}$                                      | 22.2                                                                                           | 23.1                                                                                                                     | 456.2                                                                                                                      |
| $D_e^{c,d}$                                            | 79.5                                                                                           | 79.5                                                                                                                     | 79.5                                                                                                                       |
| H <sub>3</sub> N-BH <sub>3</sub>                       |                                                                                                |                                                                                                                          |                                                                                                                            |
|                                                        | NH <sub>3</sub> (A <sub>1</sub> <sup>2</sup> ); BH <sub>3</sub> (A <sub>1</sub> <sup>0</sup> ) | NH <sub>3</sub> <sup>+</sup> (A <sub>1</sub> <sup>1</sup> ); BH <sub>3</sub> <sup>-</sup> (A <sub>1</sub> <sup>1</sup> ) | NH <sub>3</sub> <sup>2+</sup> (A <sub>1</sub> <sup>0</sup> ); BH <sub>3</sub> <sup>2-</sup> (A <sub>1</sub> <sup>2</sup> ) |
| $\Delta E_{int}$                                       | -44.6                                                                                          | -284.9                                                                                                                   | -988.3                                                                                                                     |
| $\Delta E_{Pauli}$                                     | 110.3                                                                                          | 200.0                                                                                                                    | 312.9                                                                                                                      |
| $\Delta E_{elstat}^b$                                  | -77.0(49.7%)                                                                                   | -227.0(46.8%)                                                                                                            | -618.3(47.5%)                                                                                                              |
| $\Delta E_{orb}^b$                                     | <b>-77.9</b> (50.3%)                                                                           | -257.9(53.2%)                                                                                                            | -682.9(52.5%)                                                                                                              |
| $\Delta E_{prep}$                                      | 12.3                                                                                           | 252.5                                                                                                                    | 956.0                                                                                                                      |
| $D_e^{c,d}$                                            | 32.4                                                                                           | 32.4                                                                                                                     | 32.4                                                                                                                       |

<sup>a</sup> All calculations were performed on the CCSD(T)/aug-cc-pVTZ optimized structures. <sup>b</sup> The value in parenthesis gives the percentage contribution to the total attractive interactions  $\Delta E_{elstat} + \Delta E_{orb}$ . <sup>c</sup> The dissociation energy ( $D_e$ ) has been computed at the specific electronic state. <sup>d</sup> computed as a single point the CCSD(T)/aug-cc-pVTZ optimized structure.

**Table S7.** Energy decomposition analysis (EDA) of  $\text{NaBH}_3^-$  (CS),  $\text{NaBH}_3^-$  (BS),  $\text{BH}_4^-$  and  $\text{NH}_3\text{BH}_3$  at the M06L/QZ4P level of theory.<sup>a</sup> Energy values are given in kcal/mol.

| $(\text{NaBH}_3)^-$ Singlet closed-shell |                                            |                                                |                                                     |
|------------------------------------------|--------------------------------------------|------------------------------------------------|-----------------------------------------------------|
|                                          | $\text{Na}^-(s^2); \text{BH}_3 (A_1^0)$    | $\text{Na}(s^1); \text{BH}_3^- (A_1^1)$        | $\text{Na}^+(s^0); \text{BH}_3^{2-} (A_1^2)$        |
| $\Delta E_{int}$                         | -17.9                                      | -37.9                                          | -269.9                                              |
| $\Delta E_{Pauli}$                       | 36.5                                       | 31.9                                           | 75.4                                                |
| $\Delta E_{elstat}^b$                    | -16.1 (29.7%)                              | -47.8(68.4%)                                   | -286.7(83.0%)                                       |
| $\Delta E_{orb}^b$                       | -38.2(70.3%)                               | <b>-22.1</b> (31.6%)                           | -58.6(17.0%)                                        |
| $\Delta E_{prep}$                        | 1.6                                        | 21.7                                           | 253.7                                               |
| $D_e^{c,d}$                              | 16.2                                       | 16.2                                           | 16.2                                                |
| $(\text{NaBH}_3)^-$ Broken Symmetry      |                                            |                                                |                                                     |
|                                          | $\text{Na}^-(s^2); \text{BH}_3 (A_1^0)$    | $\text{Na}(s^1); \text{BH}_3^- (A_1^1)$        | $\text{Na}^+(s^0); \text{BH}_3^{2-} (A_1^2)$        |
| $\Delta E_{int}$                         | -20.6                                      | -40.7                                          | -272.7                                              |
| $\Delta E_{Pauli}$                       | 36.5                                       | 31.9                                           | 75.4                                                |
| $\Delta E_{elstat}^b$                    | -16.1(28.2%)                               | -47.8(65.8%)                                   | -286.7(82.4%)                                       |
| $\Delta E_{orb}^b$                       | -41.0(71.8%)                               | <b>-24.8</b> (34.2%)                           | -61.3(17.6%)                                        |
| $\Delta E_{prep}$                        | 1.6                                        | 21.7                                           | 253.7                                               |
| $D_e^{c,d}$                              | 19.0                                       | 19.0                                           | 19.0                                                |
| $\text{BH}_4^-$                          |                                            |                                                |                                                     |
|                                          | $\text{H}^-(s^2); \text{BH}_3 (A_1^0)$     | $\text{H}(s^1); \text{BH}_3^- (A_1^1)$         | $\text{H}^+(s^0); \text{BH}_3^{2-} (A_1^2)$         |
| $\Delta E_{int}$                         | -101.6                                     | -106.1                                         | -546.1                                              |
| $\Delta E_{Pauli}$                       | 136.6                                      | 41.4                                           | 0.0                                                 |
| $\Delta E_{elstat}^b$                    | -85.0(35.7%)                               | -40.8(27.7%)                                   | -246.9(45.2%)                                       |
| $\Delta E_{orb}^b$                       | -153.2(64.3%)                              | <b>-106.6</b> (72.3%)                          | -299.2(54.8%)                                       |
| $\Delta E_{prep}$                        | 23.5                                       | 28.0                                           | 468.0                                               |
| $D_e^{c,d}$                              | 78.1                                       | 78.1                                           | 78.1                                                |
| $\text{H}_3\text{N}-\text{BH}_3$         |                                            |                                                |                                                     |
|                                          | $\text{NH}_3 (A_1^2); \text{BH}_3 (A_1^0)$ | $\text{NH}_3^+ (A_1^1); \text{BH}_3^- (A_1^1)$ | $\text{NH}_3^{2+}(A_1^0); \text{BH}_3^{2-} (A_1^2)$ |
| $\Delta E_{int}$                         | -45.1                                      | -290.6                                         | -991.0                                              |
| $\Delta E_{Pauli}$                       | 102.0                                      | 204.7                                          | 317.3                                               |
| $\Delta E_{elstat}^b$                    | -76.6(52.1%)                               | -225.3(45.5%)                                  | -614.3(47.0%)                                       |
| $\Delta E_{orb}^b$                       | <b>-70.4</b> (47.9%)                       | -270.0(54.5%)                                  | -694.0(53.0%)                                       |
| $\Delta E_{prep}$                        | 12.8                                       | 258.4                                          | 958.7                                               |
| $D_e^{c,d}$                              | 32.2                                       | 32.2                                           | 32.2                                                |

<sup>a</sup> All calculations were performed on the CCSD(T)/aug-cc-pVTZ optimized structures. <sup>b</sup> The value in parenthesis gives the percentage contribution to the total attractive interactions  $\Delta E_{elstat} + \Delta E_{orb}$ . <sup>c</sup> the dissociation energy ( $D_e$ ) has been computed at the specific electronic state. <sup>d</sup> computed as a single point the CCSD(T)/aug-cc-pVTZ optimized structure.



**Table S8.** Energy decomposition analysis (EDA) of  $\text{NaBH}_3^-$  (CS),  $\text{NaBH}_3^-$  (BS),  $\text{BH}_4^-$  and  $\text{NH}_3\text{BH}_3$  at the PBE0/QZ4P level of theory.<sup>a</sup> Energy values are given in kcal/mol.

| $(\text{NaBH}_3)^-$ Singlet closed-shell |                                            |                                                |                                                     |
|------------------------------------------|--------------------------------------------|------------------------------------------------|-----------------------------------------------------|
|                                          | $\text{Na}^-(s^2); \text{BH}_3 (A_1^0)$    | $\text{Na}(s^1); \text{BH}_3^- (A_1^1)$        | $\text{Na}^+(s^0); \text{BH}_3^{2-} (A_1^2)$        |
| $\Delta E_{int}$                         | -18.5                                      | -29.5                                          | -283.1                                              |
| $\Delta E_{Pauli}$                       | 33.4                                       | 30.7                                           | 66.6                                                |
| $\Delta E_{elstat}^b$                    | -17.1 (32.9%)                              | -43.6(72.4%)                                   | -289.6(82.8%)                                       |
| $\Delta E_{orb}^b$                       | -34.8 (67.1%)                              | <b>-16.6</b> (27.6%)                           | -60.0(17.2%)                                        |
| $\Delta E_{prep}$                        | 1.4                                        | 12.3                                           | 265.9                                               |
| $D_e^{c,d}$                              | 17.1                                       | 17.1                                           | 17.1                                                |
| $(\text{NaBH}_3)^-$ Broken Symmetry      |                                            |                                                |                                                     |
|                                          | $\text{Na}^-(s^2); \text{BH}_3 (A_1^0)$    | $\text{Na}(s^1); \text{BH}_3^- (A_1^1)$        | $\text{Na}^+(s^0); \text{BH}_3^{2-} (A_1^2)$        |
| $\Delta E_{int}$                         | -21.1                                      | -32.1                                          | -285.7                                              |
| $\Delta E_{Pauli}$                       | 33.4                                       | 30.7                                           | 66.6                                                |
| $\Delta E_{elstat}^b$                    | -17.1(31.4%)                               | -43.6(69.4%)                                   | -289.6(82.2%)                                       |
| $\Delta E_{orb}^b$                       | -37.4(68.6%)                               | <b>-19.2</b> (30.6%)                           | -62.7(17.8%)                                        |
| $\Delta E_{prep}$                        | 1.4                                        | 12.3                                           | 266.0                                               |
| $D_e^{c,d}$                              | 19.8                                       | 19.8                                           | 19.8                                                |
| $\text{BH}_4^-$                          |                                            |                                                |                                                     |
|                                          | $\text{H}^-(s^2); \text{BH}_3 (A_1^0)$     | $\text{H}(s^1); \text{BH}_3^- (A_1^1)$         | $\text{H}^+(s^0); \text{BH}_3^{2-} (A_1^2)$         |
| $\Delta E_{int}$                         | -104.8                                     | -103.0                                         | -540.4                                              |
| $\Delta E_{Pauli}$                       | 136.3                                      | 42.6                                           | 0.0                                                 |
| $\Delta E_{elstat}^b$                    | -86.9(36.0%)                               | -39.3(27.0%)                                   | -247.5(45.8%)                                       |
| $\Delta E_{orb}^b$                       | -154.2(64.0%)                              | <b>-106.3</b> (73.0%)                          | -293.0(54.2%)                                       |
| $\Delta E_{prep}$                        | 23.2                                       | 21.4                                           | 458.8                                               |
| $D_e^{c,d}$                              | 81.6                                       | 81.6                                           | 81.6                                                |
| $\text{H}_3\text{N}-\text{BH}_3$         |                                            |                                                |                                                     |
|                                          | $\text{NH}_3 (A_1^2); \text{BH}_3 (A_1^0)$ | $\text{NH}_3^+ (A_1^1); \text{BH}_3^- (A_1^1)$ | $\text{NH}_3^{2+}(A_1^0); \text{BH}_3^{2-} (A_1^2)$ |
| $\Delta E_{int}$                         | -47.3                                      | -288.8                                         | -993.9                                              |
| $\Delta E_{Pauli}$                       | 105.4                                      | 202.3                                          | 317.9                                               |
| $\Delta E_{elstat}^b$                    | -76.8(50.3%)                               | -227.8(46.4%)                                  | -625.3(47.7%)                                       |
| $\Delta E_{orb}^b$                       | <b>-75.9</b> (49.7%)                       | -263.3(53.6%)                                  | -686.6(52.3%)                                       |
| $\Delta E_{prep}$                        | 12.7                                       | 254.2                                          | 959.4                                               |
| $D_e^{c,d}$                              | 34.5                                       | 34.5                                           | 34.5                                                |

<sup>a</sup> All calculations were performed on the CCSD(T)/aug-cc-pVTZ optimized structures. <sup>b</sup> The value in parenthesis gives the percentage contribution to the total attractive interactions  $\Delta E_{elstat} + \Delta E_{orb}$ . <sup>c</sup> the dissociation energy ( $D_e$ ) has been computed at the specific electronic state. <sup>d</sup> computed as a single point the CCSD(T)/aug-cc-pVTZ optimized structure.

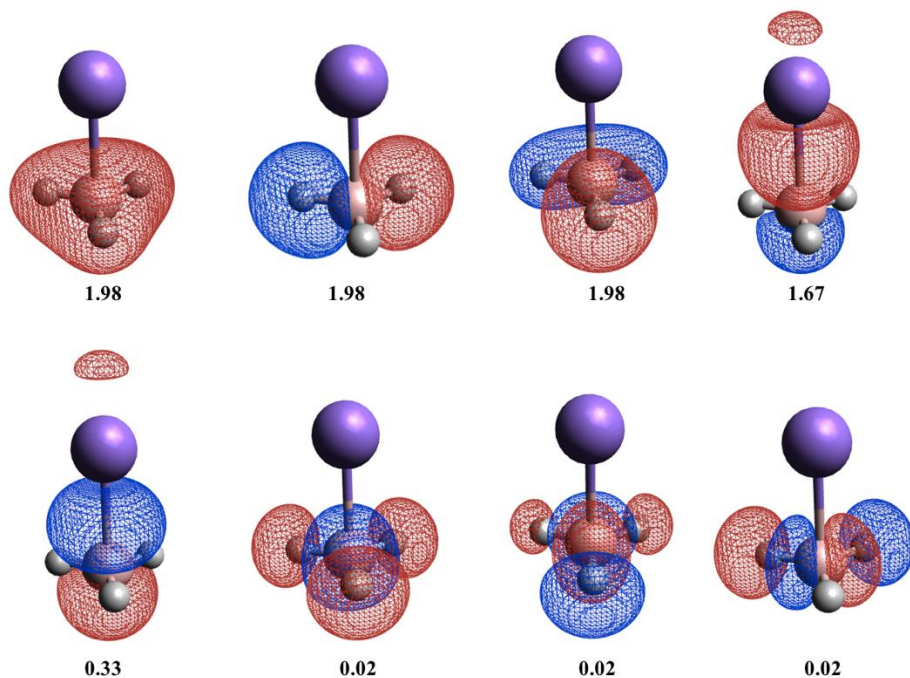

**Figure S1.** (8,8) active space for  $\text{NaBH}_3^-$  at the CASPT2/AVQZ equilibrium geometry, including the orbital occupation numbers.

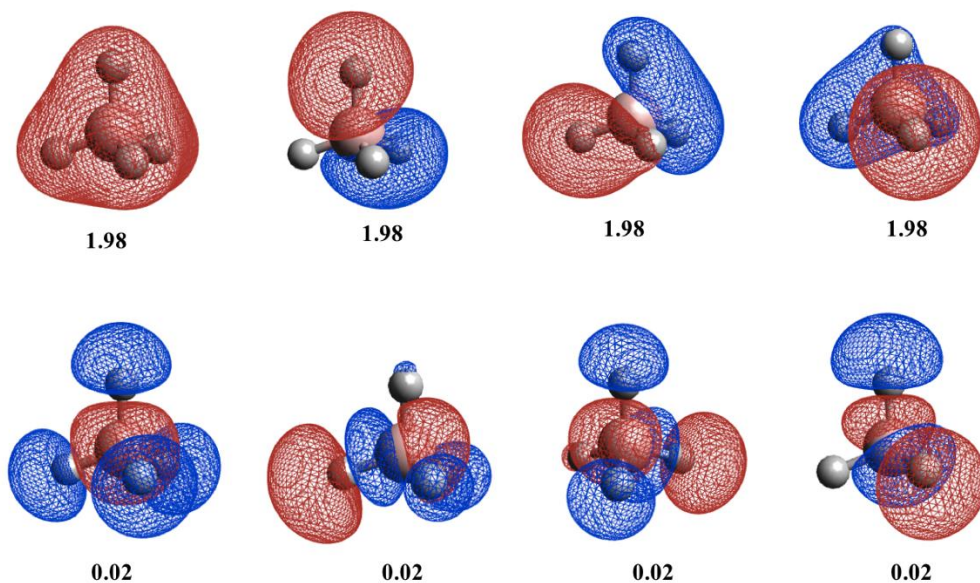

**Figure S2.** (8,8) active space for  $\text{BH}_4^-$  at the CASPT2/AVQZ equilibrium geometry, including the orbital occupation numbers.

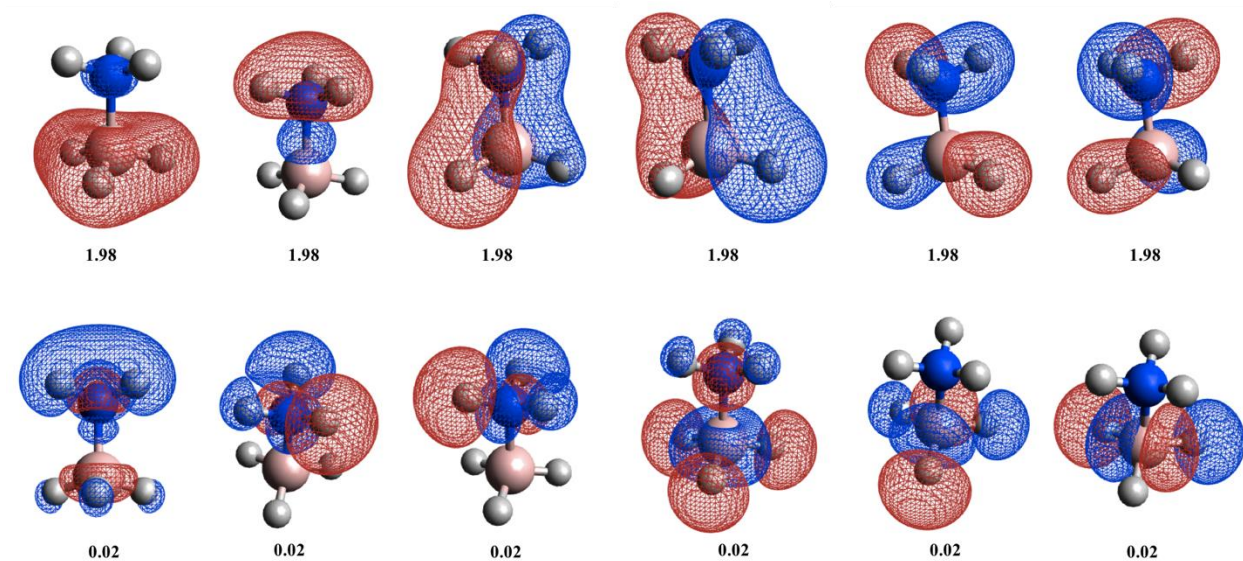

**Figure S3.** (12,12) active space for  $\text{NH}_3\text{BH}_3$  system at the CASPT2/AVQZ equilibrium geometry, including the orbital occupation numbers.

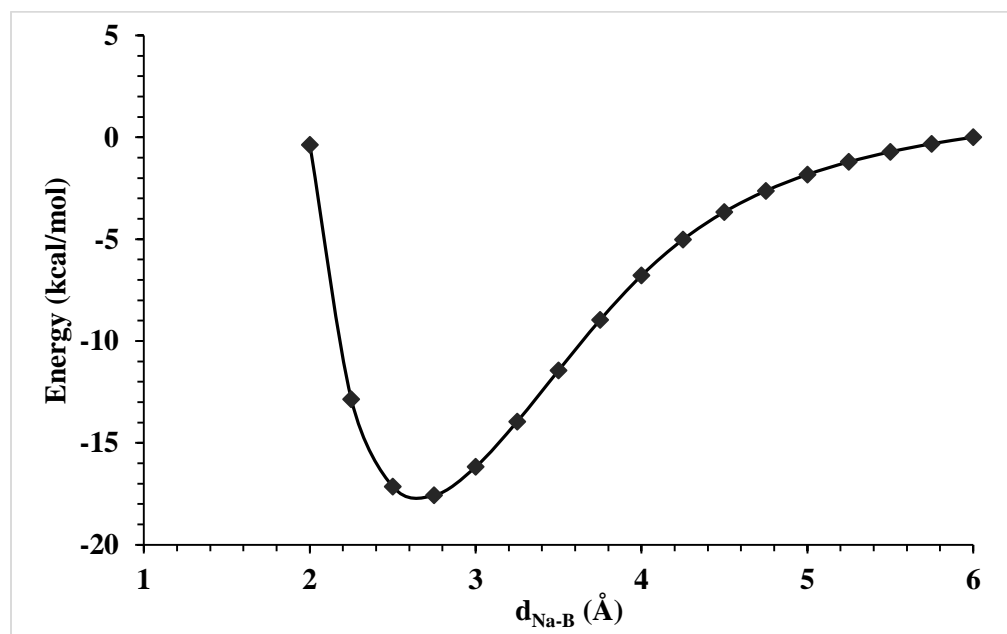

**Figure S4.**  $\text{NaBH}_3^-$  dissociation curve calculated at the CASPT2/AVQZ level of theory

## XYZ coordinates and Absolute Energies in Hartrees

**(NaBH<sub>3</sub>)<sup>-</sup> (singlet)****HF/aug-cc-pVTZ= -188.255657746**

|    |                 |                 |                 |
|----|-----------------|-----------------|-----------------|
| B  | 0.000000000000  | 0.000000000000  | -2.812690000000 |
| H  | 0.000000000000  | 1.187973000000  | -2.837327000000 |
| H  | 1.028815000000  | -0.593987000000 | -2.837327000000 |
| H  | -1.028815000000 | -0.593987000000 | -2.837327000000 |
| Na | 0.000000000000  | 0.000000000000  | 2.052312000000  |

**(NaBH<sub>3</sub>)<sup>-</sup> (singlet open shell)****HF/aug-cc-pVTZ= -188.268056636**

|    |                 |                 |                 |
|----|-----------------|-----------------|-----------------|
| B  | 0.000000000000  | 0.000000000000  | -1.596607000000 |
| H  | 0.000000000000  | 1.199085000000  | -1.740075000000 |
| H  | 1.038438000000  | -0.599543000000 | -1.740075000000 |
| H  | -1.038438000000 | -0.599543000000 | -1.740075000000 |
| Na | 0.000000000000  | 0.000000000000  | 1.200297000000  |

**(NaBH<sub>3</sub>)<sup>-</sup> (triplet)****HF/aug-cc-pVTZ= -188.267480345**

|    |                 |                 |                 |
|----|-----------------|-----------------|-----------------|
| Na | -0.021656000000 | -1.083543000000 | 0.000000000000  |
| B  | -0.021656000000 | 1.473574000000  | 0.000000000000  |
| H  | -0.342176000000 | 2.627918000000  | 0.000000000000  |
| H  | 0.344332000000  | 0.961593000000  | 1.039337000000  |
| H  | 0.344332000000  | 0.961593000000  | -1.039337000000 |

**(NaBH<sub>3</sub>)<sup>-</sup> (singlet)****MP2/aug-cc-pVTZ= -188.247574245**

|    |                 |                 |                 |
|----|-----------------|-----------------|-----------------|
| B  | 0.000000000000  | 0.000000000000  | -1.580051000000 |
| H  | 0.000000000000  | 1.197491000000  | -1.702947000000 |
| H  | 1.037058000000  | -0.598746000000 | -1.702947000000 |
| H  | -1.037058000000 | -0.598746000000 | -1.702947000000 |
| Na | 0.000000000000  | 0.000000000000  | 1.182645000000  |

**(NaBH<sub>3</sub>)<sup>-</sup> (singlet open shell)****MP2/aug-cc-pVTZ= -188.267603805**

|    |                 |                 |                 |
|----|-----------------|-----------------|-----------------|
| B  | 0.000000000000  | 0.000000000000  | -1.557213000000 |
| H  | 0.000000000000  | 1.202916000000  | -1.631632000000 |
| H  | 1.041755000000  | -0.601458000000 | -1.631632000000 |
| H  | -1.041755000000 | -0.601458000000 | -1.631632000000 |
| Na | 0.000000000000  | 0.000000000000  | 1.152815000000  |

**(NaBH<sub>3</sub>)<sup>-</sup> (triplet)****MP2/aug-cc-pVTZ= -188.267176170**

|    |                 |                 |                 |
|----|-----------------|-----------------|-----------------|
| Na | -0.009453000000 | -1.088197000000 | 0.000000000000  |
| B  | -0.009453000000 | 1.492507000000  | 0.000000000000  |
| H  | -0.243241000000 | 2.666061000000  | 0.000000000000  |
| H  | 0.197247000000  | 0.920785000000  | 1.046184000000  |
| H  | 0.197247000000  | 0.920785000000  | -1.046184000000 |

**(NaBH<sub>3</sub>)<sup>-</sup> (singlet)****CCSD/aug-cc-pVTZ= -188.4323077**

|    |                 |                 |                 |
|----|-----------------|-----------------|-----------------|
| B  | 0.000000000000  | 0.000000000000  | -1.601178000000 |
| H  | 0.000000000000  | 1.200697000000  | -1.704129000000 |
| H  | 1.039834000000  | -0.600348000000 | -1.704129000000 |
| H  | -1.039834000000 | -0.600348000000 | -1.704129000000 |
| Na | 0.000000000000  | 0.000000000000  | 1.192571000000  |

**(NaBH<sub>3</sub>)<sup>-</sup> (singlet open shell)****CCSD/aug-cc-pVTZ= -188.4333956**

|    |                 |                 |                 |
|----|-----------------|-----------------|-----------------|
| B  | 0.000000000000  | 0.000000000000  | -1.571274000000 |
| H  | 0.000000000000  | 1.203324000000  | -1.674596000000 |
| H  | 1.042109000000  | -0.601662000000 | -1.674596000000 |
| H  | -1.042109000000 | -0.601662000000 | -1.674596000000 |
| Na | 0.000000000000  | 0.000000000000  | 1.170923000000  |

**(NaBH<sub>3</sub>)<sup>-</sup> (triplet)****CCSD/aug-cc-pVTZ= -188.429702**

|    |                 |                 |                 |
|----|-----------------|-----------------|-----------------|
| Na | -0.011999000000 | -1.086143000000 | 0.000000000000  |
| B  | -0.011999000000 | 1.487548000000  | 0.000000000000  |
| H  | -0.274075000000 | 2.658532000000  | 0.000000000000  |
| H  | 0.233033000000  | 0.925648000000  | 1.048033000000  |
| H  | 0.233033000000  | 0.925648000000  | -1.048033000000 |

**(NaBH<sub>3</sub>)<sup>-</sup> (singlet)****CCSD(T)/aug-cc-pVTZ= -188.44301121**

|    |                 |                 |                 |
|----|-----------------|-----------------|-----------------|
| B  | 0.000000000000  | -0.000000245100 | -1.589247392800 |
| H  | 0.000000000000  | 1.206137827800  | -1.682180509100 |
| H  | 1.044546213800  | -0.603069269600 | -1.682180378700 |
| H  | -1.044546213800 | -0.603069269600 | -1.682180378700 |
| Na | 0.000000000000  | -0.000000043500 | 1.129541659200  |

**(NaBH<sub>3</sub>)<sup>-</sup> (triplet)****CCSD(T)/aug-cc-pVTZ= -188.43478510**

|    |               |               |                |
|----|---------------|---------------|----------------|
| Na | 0.0496436337  | -1.0943927105 | 0.000000000000 |
| B  | -0.0370246199 | 1.4838028170  | 0.000000000000 |
| H  | -0.3306571828 | 2.6483968447  | 0.000000000000 |
| H  | 0.2174655845  | 0.9262575244  | 1.0494489804   |
| H  | 0.2174655845  | 0.9262575244  | -1.0494489804  |

**(NaBH<sub>3</sub>)<sup>-</sup> (singlet)****BP86/aug-cc-pVTZ= -188.952347699**

|    |                 |                 |                 |
|----|-----------------|-----------------|-----------------|
| B  | 0.000000000000  | 0.000000000000  | -1.553490000000 |
| H  | 0.000000000000  | 1.208141000000  | -1.638662000000 |
| H  | 1.046281000000  | -0.604071000000 | -1.638662000000 |
| H  | -1.046281000000 | -0.604071000000 | -1.638662000000 |
| Na | 0.000000000000  | 0.000000000000  | 1.153040000000  |

**(NaBH<sub>3</sub>)<sup>-</sup> (singlet open shell)****BP86/aug-cc-pVTZ= -188.952979279**

|    |                 |                 |                 |
|----|-----------------|-----------------|-----------------|
| B  | 0.000000000000  | 0.000000000000  | -1.551542000000 |
| H  | 0.000000000000  | 1.209313000000  | -1.633603000000 |
| H  | 1.047295000000  | -0.604656000000 | -1.633603000000 |
| H  | -1.047295000000 | -0.604656000000 | -1.633603000000 |
| Na | 0.000000000000  | 0.000000000000  | 1.150774000000  |

**(NaBH<sub>3</sub>)<sup>-</sup> (triplet)****BP86/aug-cc-pVTZ= -188.942287421**

|    |                 |                 |                 |
|----|-----------------|-----------------|-----------------|
| Na | -0.008600000000 | -1.089070000000 | 0.000000000000  |
| B  | -0.008600000000 | 1.489818000000  | 0.000000000000  |
| H  | -0.500007000000 | 2.591726000000  | 0.000000000000  |
| H  | 0.318805000000  | 0.969478000000  | 1.053217000000  |
| H  | 0.318805000000  | 0.969478000000  | -1.053217000000 |

**(NaBH<sub>3</sub>)<sup>-</sup> (singlet)****PBE/aug-cc-pVTZ= -188.775055645**

|    |                 |                 |                 |
|----|-----------------|-----------------|-----------------|
| B  | 0.000000000000  | 0.000000000000  | -1.543924000000 |
| H  | 0.000000000000  | 1.208684000000  | -1.629550000000 |
| H  | 1.046751000000  | -0.604342000000 | -1.629550000000 |
| H  | -1.046751000000 | -0.604342000000 | -1.629550000000 |
| Na | 0.000000000000  | 0.000000000000  | 1.146206000000  |

**(NaBH<sub>3</sub>)<sup>-</sup> (singlet open shell)****PBE/aug-cc-pVTZ= -188.775965862**

|    |                 |                 |                 |
|----|-----------------|-----------------|-----------------|
| B  | 0.000000000000  | -0.000019000000 | -1.627476000000 |
| H  | -0.000001000000 | 1.210083000000  | -1.708563000000 |
| H  | 1.047971000000  | -0.605059000000 | -1.708707000000 |
| H  | -1.047971000000 | -0.605058000000 | -1.708709000000 |
| Na | 0.000001000000  | 0.000054000000  | 1.053287000000  |

**(NaBH<sub>3</sub>)<sup>-</sup> (triplet)****PBE/aug-cc-pVTZ= -188.765562127**

|    |                 |                 |                 |
|----|-----------------|-----------------|-----------------|
| Na | -0.009068000000 | -1.082205000000 | 0.000000000000  |
| B  | -0.009068000000 | 1.479608000000  | 0.000000000000  |
| H  | -0.506720000000 | 2.578855000000  | 0.000000000000  |
| H  | 0.325904000000  | 0.963681000000  | 1.053817000000  |
| H  | 0.325904000000  | 0.963681000000  | -1.053817000000 |

(NaBH<sub>3</sub>)<sup>-</sup> (singlet)

TPSS/aug-cc-pVTZ=-188.970243536

|    |                 |                 |                 |
|----|-----------------|-----------------|-----------------|
| B  | 0.000000000000  | 0.000000000000  | -1.583482000000 |
| H  | 0.000000000000  | 1.202229000000  | -1.662011000000 |
| H  | 1.041161000000  | -0.601115000000 | -1.662011000000 |
| H  | -1.041161000000 | -0.601115000000 | -1.662011000000 |
| Na | 0.000000000000  | 0.000000000000  | 1.173040000000  |

(NaBH<sub>3</sub>)<sup>-</sup> (singlet open shell)

TPSS/aug-cc-pVTZ=-188.972459940

|    |                 |                 |                 |
|----|-----------------|-----------------|-----------------|
| B  | 0.000000000000  | 0.000000000000  | -1.564878000000 |
| H  | 0.000000000000  | 1.204985000000  | -1.648745000000 |
| H  | 1.043548000000  | -0.602493000000 | -1.648745000000 |
| H  | -1.043548000000 | -0.602493000000 | -1.648745000000 |
| Na | 0.000000000000  | 0.000000000000  | 1.160966000000  |

(NaBH<sub>3</sub>)<sup>-</sup> (triplet)

TPSS/aug-cc-pVTZ=-188.961853875

|    |                 |                 |                 |
|----|-----------------|-----------------|-----------------|
| Na | -0.012590000000 | -1.079756000000 | 0.000000000000  |
| B  | -0.012590000000 | 1.473686000000  | 0.000000000000  |
| H  | -0.463574000000 | 2.587407000000  | 0.000000000000  |
| H  | 0.332509000000  | 0.960742000000  | 1.047806000000  |
| H  | 0.332509000000  | 0.960742000000  | -1.047806000000 |

(NaBH<sub>3</sub>)<sup>-</sup> (singlet)

M06L/aug-cc-pVTZ= -188.919595942

|    |                 |                 |                 |
|----|-----------------|-----------------|-----------------|
| B  | 0.000000000000  | 0.000000000000  | -1.551067000000 |
| H  | 0.000000000000  | 1.194021000000  | -1.623453000000 |
| H  | 1.034052000000  | -0.597010000000 | -1.623453000000 |
| H  | -1.034052000000 | -0.597010000000 | -1.623453000000 |
| Na | 0.000000000000  | 0.000000000000  | 1.147790000000  |

(NaBH<sub>3</sub>)<sup>-</sup> (singlet open shell)

M06L/aug-cc-pVTZ=-188.924165349

|    |                 |                 |                 |
|----|-----------------|-----------------|-----------------|
| B  | 0.000000000000  | 0.000000000000  | -1.530158000000 |
| H  | 0.000000000000  | 1.195433000000  | -1.623083000000 |
| H  | 1.035275000000  | -0.597716000000 | -1.623083000000 |
| H  | -1.035275000000 | -0.597716000000 | -1.623083000000 |
| Na | 0.000000000000  | 0.000000000000  | 1.138185000000  |

(NaBH<sub>3</sub>)<sup>-</sup> (triplet)

M06L/aug-cc-pVTZ= -188.917206402

|    |                 |                 |                 |
|----|-----------------|-----------------|-----------------|
| Na | -1.055461000000 | 0.000640000000  | -0.033939000000 |
| B  | 1.426101000000  | -0.000241000000 | -0.006519000000 |
| H  | 2.518085000000  | 0.005678000000  | -0.485011000000 |
| H  | 0.977460000000  | 1.028103000000  | 0.447928000000  |
| H  | 0.984019000000  | -1.033279000000 | 0.443003000000  |

(NaBH<sub>3</sub>)<sup>-</sup> (singlet)

B3LYP/aug-cc-pVTZ= -188.968879662

|    |                 |                 |                 |
|----|-----------------|-----------------|-----------------|
| B  | 0.000000000000  | 0.000000000000  | -1.586308000000 |
| H  | 0.000000000000  | 1.195921000000  | -1.669715000000 |
| H  | 1.035698000000  | -0.597960000000 | -1.669715000000 |
| H  | -1.035698000000 | -0.597960000000 | -1.669715000000 |
| Na | 0.000000000000  | 0.000000000000  | 1.176426000000  |

(NaBH<sub>3</sub>)<sup>-</sup> (singlet open shell)

B3LYP/aug-cc-pVTZ= -188.969739549

|    |                 |                 |                 |
|----|-----------------|-----------------|-----------------|
| B  | 0.000000000000  | 0.000000000000  | -1.570656000000 |
| H  | 0.000000000000  | 1.197637000000  | -1.654967000000 |
| H  | 1.037184000000  | -0.598818000000 | -1.654967000000 |
| H  | -1.037184000000 | -0.598818000000 | -1.654967000000 |
| Na | 0.000000000000  | 0.000000000000  | 1.165289000000  |

(NaBH<sub>3</sub>)<sup>-</sup> (triplet)

B3LYP/aug-cc-pVTZ= -188.958804675

|    |                 |                 |                |
|----|-----------------|-----------------|----------------|
| Na | -0.008350000000 | -1.082046000000 | 0.000000000000 |
| B  | -0.008350000000 | 1.482535000000  | 0.000000000000 |

|   |                 |                |                 |
|---|-----------------|----------------|-----------------|
| H | -0.397345000000 | 2.613375000000 | 0.000000000000  |
| H | 0.265469000000  | 0.938229000000 | 1.043631000000  |
| H | 0.265469000000  | 0.938229000000 | -1.043631000000 |

(NaBH<sub>3</sub>)<sup>-</sup> (singlet)

X3LYP/aug-cc-pVTZ=-188.912621196

|    |                 |                 |                 |
|----|-----------------|-----------------|-----------------|
| B  | 0.000000000000  | 0.000000000000  | -1.584068000000 |
| H  | 0.000000000000  | 1.195645000000  | -1.666543000000 |
| H  | 1.035459000000  | -0.597823000000 | -1.666543000000 |
| H  | -1.035459000000 | -0.597823000000 | -1.666543000000 |
| Na | 0.000000000000  | 0.000000000000  | 1.174542000000  |

(NaBH<sub>3</sub>)<sup>-</sup> (singlet open shell)

X3YP/aug-cc-pVTZ=-188.913497292

|    |                 |                 |                 |
|----|-----------------|-----------------|-----------------|
| B  | 0.000000000000  | 0.000000000000  | -1.567137000000 |
| H  | 0.000000000000  | 1.197395000000  | -1.650530000000 |
| H  | 1.036975000000  | -0.598698000000 | -1.650530000000 |
| H  | -1.036975000000 | -0.598698000000 | -1.650530000000 |
| Na | 0.000000000000  | 0.000000000000  | 1.162480000000  |

(NaBH<sub>3</sub>)<sup>-</sup> (triplet)

X3LYP/aug-cc-pVTZ=-188.902377233

|    |                 |                 |                 |
|----|-----------------|-----------------|-----------------|
| Na | -0.008190000000 | -1.078795000000 | 0.000000000000  |
| B  | -0.008190000000 | 1.478518000000  | 0.000000000000  |
| H  | -0.379470000000 | 2.614922000000  | 0.000000000000  |
| H  | 0.255253000000  | 0.929615000000  | 1.043641000000  |
| H  | 0.255253000000  | 0.929615000000  | -1.043641000000 |

(NaBH<sub>3</sub>)<sup>-</sup> (singlet)

PBE0/aug-cc-pVTZ= -188.793028628

|    |                 |                 |                 |
|----|-----------------|-----------------|-----------------|
| B  | 0.000000000000  | 0.000000000000  | -1.574074000000 |
| H  | 0.000000000000  | 1.201702000000  | -1.662799000000 |
| H  | 1.040704000000  | -0.600851000000 | -1.662799000000 |
| H  | -1.040704000000 | -0.600851000000 | -1.662799000000 |
| Na | 0.000000000000  | 0.000000000000  | 1.168979000000  |

(NaBH<sub>3</sub>)<sup>-</sup> (singlet open shell)

PBE0/aug-cc-pVTZ= -188.797438526

|    |                 |                 |                 |
|----|-----------------|-----------------|-----------------|
| B  | 0.000000000000  | 0.000000000000  | -1.538493000000 |
| H  | 0.000000000000  | 1.205151000000  | -1.624918000000 |
| H  | 1.043692000000  | -0.602576000000 | -1.624918000000 |
| H  | -1.043692000000 | -0.602576000000 | -1.624918000000 |
| Na | 0.000000000000  | 0.000000000000  | 1.142474000000  |

(NaBH<sub>3</sub>)<sup>-</sup> (triplet)

PBE0/aug-cc-pVTZ= -188.790325344

|    |                 |                 |                 |
|----|-----------------|-----------------|-----------------|
| Na | -0.012288000000 | -1.072113000000 | 0.000000000000  |
| B  | -0.012288000000 | 1.463719000000  | 0.000000000000  |
| H  | -0.433692000000 | 2.588743000000  | 0.000000000000  |
| H  | 0.315148000000  | 0.942952000000  | 1.048754000000  |
| H  | 0.315148000000  | 0.942952000000  | -1.048754000000 |

(NaBH<sub>3</sub>)<sup>-</sup> (singlet)

mPW1PW91/aug-cc-pVTZ=-188.924177849

|    |                 |                 |                 |
|----|-----------------|-----------------|-----------------|
| B  | 0.000000000000  | 0.000000000000  | -1.583904000000 |
| H  | 0.000000000000  | 1.199559000000  | -1.672956000000 |
| H  | 1.038848000000  | -0.599779000000 | -1.672956000000 |
| H  | -1.038848000000 | -0.599779000000 | -1.672956000000 |
| Na | 0.000000000000  | 0.000000000000  | 1.176217000000  |

(NaBH<sub>3</sub>)<sup>-</sup> (singlet open shell)

mPW1PW91/aug-cc-pVTZ=-188.929092471

|    |                 |                 |                 |
|----|-----------------|-----------------|-----------------|
| B  | 0.000000000000  | 0.000000000000  | -1.544555000000 |
| H  | 0.000000000000  | 1.203265000000  | -1.633370000000 |
| H  | 1.042058000000  | -0.601632000000 | -1.633370000000 |
| H  | -1.042058000000 | -0.601632000000 | -1.633370000000 |
| Na | 0.000000000000  | 0.000000000000  | 1.147535000000  |

(NaBH<sub>3</sub>)<sup>-</sup> (triplet)  
mPW1PW91/aug-cc-pVTZ=-188.922437935  
Na -0.012610000000 -1.075180000000 0.000000000000  
B -0.012610000000 1.467470000000 0.000000000000  
H -0.437112000000 2.589499000000 0.000000000000  
H 0.319437000000 0.950067000000 1.046854000000  
H 0.319437000000 0.950067000000 -1.046854000000

(NaBH<sub>3</sub>)<sup>-</sup> (singlet)  
BHLYP/aug-cc-pVTZ=-188.908579872  
B 0.000000000000 0.000000000000 -1.644270000000  
H 0.000000000000 1.188300000000 -1.723742000000  
H 1.029098000000 -0.594150000000 -1.723742000000  
H -1.029098000000 -0.594150000000 -1.723742000000  
Na 0.000000000000 0.000000000000 1.217507000000

(NaBH<sub>3</sub>)<sup>-</sup> (singlet open shell)  
BHLYP/aug-cc-pVTZ=-188.912220478  
B 0.000000000000 0.000000000000 -1.565205000000  
H 0.000000000000 1.192359000000 -1.657450000000  
H 1.032613000000 -0.596179000000 -1.657450000000  
H -1.032613000000 -0.596179000000 -1.657450000000  
Na 0.000000000000 0.000000000000 1.163489000000

(NaBH<sub>3</sub>)<sup>-</sup> (triplet)  
BHLYP/aug-cc-pVTZ=-188.904313642  
Na -0.010903000000 -1.069052000000 0.000000000000  
B -0.010903000000 1.464182000000 0.000000000000  
H -0.315797000000 2.614490000000 0.000000000000  
H 0.245120000000 0.912088000000 1.038613000000  
H 0.245120000000 0.912088000000 -1.038613000000

(NaBH<sub>3</sub>)<sup>-</sup> (singlet)  
TPSSh/aug-cc-pVTZ=-188.958563962  
B 0.000000000000 0.000000000000 -1.593381000000  
H 0.000000000000 1.200127000000 -1.673824000000  
H 1.039340000000 -0.600063000000 -1.673824000000  
H -1.039340000000 -0.600063000000 -1.673824000000  
Na 0.000000000000 0.000000000000 1.180761000000

(NaBH<sub>3</sub>)<sup>-</sup> (singlet open shell)  
TPSSh/aug-cc-pVTZ=-188.961967066  
B 0.000000000000 0.000000000000 -1.562722000000  
H 0.000000000000 1.203453000000 -1.650654000000  
H 1.042221000000 -0.601726000000 -1.650654000000  
H -1.042221000000 -0.601726000000 -1.650654000000  
Na 0.000000000000 0.000000000000 1.160507000000

(NaBH<sub>3</sub>)<sup>-</sup> (triplet)  
TPSSh/aug-cc-pVTZ=-188.952283948  
Na -0.013897000000 -1.075723000000 0.000000000000  
B -0.013897000000 1.467169000000 0.000000000000  
H -0.443113000000 2.587972000000 0.000000000000  
H 0.332735000000 0.954569000000 1.046202000000  
H 0.332735000000 0.954569000000 -1.046202000000

(NaBH<sub>3</sub>)<sup>-</sup> (singlet)  
M06/aug-cc-pVTZ=-188.901311361  
B 1.618301000000 -0.000005000000 -0.000011000000  
H 1.676527000000 0.862915000000 -0.826120000000  
H 1.676805000000 0.283959000000 1.160328000000  
H 1.676442000000 -1.146910000000 -0.334277000000  
Na -1.192844000000 0.000006000000 0.000011000000

(NaBH<sub>3</sub>)<sup>-</sup> (singlet open shell)  
M06/aug-cc-pVTZ=-188.901946682  
B -0.000002000000 -0.000032000000 -1.638342000000  
H 0.000002000000 1.196114000000 -1.715007000000  
H 1.035868000000 -0.598097000000 -1.715287000000  
H -1.035869000000 -0.598100000000 -1.715289000000

Na 0.000001000000 0.000115000000 1.083756000000

(NaBH<sub>3</sub>)<sup>-</sup> (triplet)  
M06/aug-cc-pVTZ=-188.892396149  
Na -0.014704000000 -1.077169000000 0.000000000000  
B -0.014704000000 1.469482000000 0.000000000000  
H -0.400982000000 2.598083000000 0.000000000000  
H 0.318124000000 0.951681000000 1.040403000000  
H 0.318124000000 0.951681000000 -1.040403000000

(NaBH<sub>3</sub>)<sup>-</sup> (singlet)  
M06-2X/aug-cc-pVTZ=-188.892192983  
B 1.545500000000 0.000045000000 -0.000077000000  
H 1.651764000000 -1.091564000000 0.486465000000  
H 1.648094000000 0.124456000000 -1.189041000000  
H 1.650296000000 0.967559000000 0.701757000000  
Na -1.152514000000 -0.000062000000 0.000109000000

(NaBH<sub>3</sub>)<sup>-</sup> (singlet open shell)  
M06-2X/aug-cc-pVTZ=-188.898180152  
B 0.000000000000 0.000000000000 -1.679853000000  
H 0.000000000000 1.206138000000 -1.772786000000  
H 1.044546000000 -0.603069000000 -1.772786000000  
H -1.044546000000 -0.603069000000 -1.772786000000  
Na 0.000000000000 0.000000000000 1.220147000000

(NaBH<sub>3</sub>)<sup>-</sup> (triplet)  
M06-2X/aug-cc-pVTZ=-188.885951207  
Na 0.283041000000 -1.034700000000 0.000000000000  
B -0.023819000000 1.482668000000 0.000000000000  
H -0.167410000000 2.667884000000 0.000000000000  
H 0.047811000000 0.891063000000 1.048369000000  
H 0.047811000000 0.891063000000 -1.048369000000

(NaBH<sub>3</sub>)<sup>-</sup> (singlet)  
CAM-B3LYP/aug-cc-pVTZ=-188.904995414  
B 0.000000000000 0.000000000000 -1.573466000000  
H 0.000000000000 1.193014000000 -1.674330000000  
H 1.033181000000 -0.596507000000 -1.674330000000  
H -1.033181000000 -0.596507000000 -1.674330000000  
Na 0.000000000000 0.000000000000 1.171847000000

(NaBH<sub>3</sub>)<sup>-</sup> (singlet open shell)  
CAM-B3LYP/aug-cc-pVTZ=-188.909649979  
B 0.000000000000 0.000000000000 -1.531358000000  
H 0.000000000000 -1.197201000000 -1.635494000000  
H -1.036807000000 0.598601000000 -1.635494000000  
H 1.036807000000 0.598601000000 -1.635494000000  
Na 0.000000000000 0.000000000000 1.142115000000

(NaBH<sub>3</sub>)<sup>-</sup> (triplet)  
CAM-B3LYP/aug-cc-pVTZ=-188.901620808  
Na -0.011131000000 -1.067157000000 0.000000000000  
B -0.011131000000 1.461413000000 0.000000000000  
H -0.291171000000 2.623686000000 0.000000000000  
H 0.234636000000 0.903985000000 1.043878000000  
H 0.234636000000 0.903985000000 -1.043878000000

(NaBH<sub>3</sub>)<sup>-</sup> (singlet)  
wB97x/aug-cc-pVTZ=-188.907359956  
B 0.000000000000 0.000000000000 -1.582052000000  
H 0.000000000000 1.197497000000 -1.685649000000  
H 1.037063000000 -0.598748000000 -1.685649000000  
H -1.037063000000 -0.598749000000 -1.685649000000  
Na 0.000000000000 0.000000000000 1.245512000000

(NaBH<sub>3</sub>)<sup>-</sup> (singlet open shell)  
wB97x/aug-cc-pVTZ=-188.913189229  
B 0.000000000000 0.000000000000 -1.526542000000

|    |                 |                 |                 |
|----|-----------------|-----------------|-----------------|
| H  | 0.000000000000  | -1.202656000000 | -1.642410000000 |
| H  | -1.041530000000 | 0.601328000000  | -1.642410000000 |
| H  | 1.041530000000  | 0.601328000000  | -1.642410000000 |
| Na | 0.000000000000  | 0.000000000000  | 1.141812000000  |

**(NaBH<sub>3</sub>)<sup>-</sup> (triplet)**

**wB97x/aug-cc-pVTZ=-188.906098241**

|    |                 |                 |                 |
|----|-----------------|-----------------|-----------------|
| Na | -0.018342000000 | -1.066209000000 | 0.000000000000  |
| B  | -0.018342000000 | 1.448930000000  | 0.000000000000  |
| H  | -0.438834000000 | 2.574759000000  | 0.000000000000  |
| H  | 0.366152000000  | 0.954447000000  | 1.045057000000  |
| H  | 0.366152000000  | 0.954447000000  | -1.045057000000 |

**(NaBH<sub>3</sub>)<sup>-</sup> (singlet)**

**B2PLYP/aug-cc-pVTZ=-188.730460491**

|    |                 |                 |                 |
|----|-----------------|-----------------|-----------------|
| B  | 1.579783000000  | 0.000000000000  | 0.000004000000  |
| H  | 1.669236000000  | 1.014416000000  | 0.634451000000  |
| H  | 1.669253000000  | -1.056654000000 | 0.561288000000  |
| H  | 1.669322000000  | 0.042242000000  | -1.195725000000 |
| Na | -1.173339000000 | 0.000000000000  | -0.000003000000 |

**(NaBH<sub>3</sub>)<sup>-</sup> (singlet open shell)**

**B2PLYP/aug-cc-pVTZ=-188.736952122**

|    |                 |                 |                 |
|----|-----------------|-----------------|-----------------|
| B  | 0.000000000000  | 0.000000000000  | -1.641565000000 |
| H  | 0.000071000000  | 1.198499000000  | -1.726521000000 |
| H  | 1.037895000000  | -0.599311000000 | -1.726521000000 |
| H  | -1.037966000000 | -0.599188000000 | -1.726521000000 |
| Na | 0.000000000000  | 0.000000000000  | 1.090439000000  |

**(NaBH<sub>3</sub>)<sup>-</sup> (triplet)**

**B2PLYP/aug-cc-pVTZ=-188.731159229**

|    |                 |                 |                 |
|----|-----------------|-----------------|-----------------|
| Na | -0.009098000000 | -1.080549000000 | 0.000000000000  |
| B  | -0.009098000000 | 1.481382000000  | 0.000000000000  |
| H  | -0.304403000000 | 2.639456000000  | 0.000000000000  |
| H  | 0.224987000000  | 0.919836000000  | 1.044050000000  |
| H  | 0.224987000000  | 0.919836000000  | -1.044050000000 |

**(NaBH<sub>3</sub>)<sup>-</sup> (singlet)**

**mPW2PYLP/aug-cc-pVTZ=-188.743440023**

|    |                 |                 |                 |
|----|-----------------|-----------------|-----------------|
| B  | 0.000000000000  | 0.000000000000  | -1.583489000000 |
| H  | 0.000000000000  | 1.194954000000  | -1.671523000000 |
| H  | 1.034861000000  | -0.597477000000 | -1.671523000000 |
| H  | -1.034861000000 | -0.597477000000 | -1.671523000000 |
| Na | 0.000000000000  | 0.000000000000  | 1.175638000000  |

**(NaBH<sub>3</sub>)<sup>-</sup> (singlet open shell)**

**mPW2PLYP/aug-cc-pVTZ=-188.749647364**

|    |                 |                 |                 |
|----|-----------------|-----------------|-----------------|
| B  | 0.000000000000  | 0.000000000000  | -1.562607000000 |
| H  | 0.000000000000  | 1.197211000000  | -1.646403000000 |
| H  | 1.036815000000  | -0.598606000000 | -1.646403000000 |
| H  | -1.036815000000 | -0.598606000000 | -1.646403000000 |
| Na | 0.000000000000  | 0.000000000000  | 1.159295000000  |

**(NaBH<sub>3</sub>)<sup>-</sup> (triplet)**

**mPW2PLYP/aug-cc-pVTZ=-188.743497236**

|    |                 |                 |                 |
|----|-----------------|-----------------|-----------------|
| Na | -0.009080000000 | -1.076760000000 | 0.000000000000  |
| B  | -0.009080000000 | 1.476519000000  | 0.000000000000  |
| H  | -0.285420000000 | 2.637998000000  | 0.000000000000  |
| H  | 0.215348000000  | 0.911886000000  | 1.043210000000  |
| H  | 0.215348000000  | 0.911886000000  | -1.043210000000 |

**(NaBH<sub>3</sub>)<sup>-</sup> (singlet)**

**PBE0DH/aug-cc-pVTZ=-188.736842612**

|    |                 |                 |                 |
|----|-----------------|-----------------|-----------------|
| B  | 0.000000000000  | 0.000000000000  | -1.587670000000 |
| H  | 0.000000000000  | 1.198600000000  | -1.678945000000 |
| H  | 1.038018000000  | -0.599300000000 | -1.678945000000 |
| H  | -1.038018000000 | -0.599300000000 | -1.678945000000 |
| Na | 0.000000000000  | 0.000000000000  | 1.179562000000  |

**(NaBH<sub>3</sub>)<sup>-</sup> (singlet open shell)**

**PBE0DH/aug-cc-pVTZ=-188.745862512**

|    |                 |                 |                 |
|----|-----------------|-----------------|-----------------|
| B  | 0.000000000000  | 0.000000000000  | -1.536423000000 |
| H  | 0.000000000000  | 1.202555000000  | -1.627599000000 |
| H  | 1.041443000000  | -0.601277000000 | -1.627599000000 |
| H  | -1.041443000000 | -0.601277000000 | -1.627599000000 |
| Na | 0.000000000000  | 0.000000000000  | 1.142265000000  |

**(NaBH<sub>3</sub>)<sup>-</sup> (triplet)**

**PBE0DH/aug-cc-pVTZ=-188.741362509**

|    |                 |                 |                 |
|----|-----------------|-----------------|-----------------|
| Na | -0.014170000000 | -1.069151000000 | 0.000000000000  |
| B  | -0.014170000000 | 1.459193000000  | 0.000000000000  |
| H  | -0.382378000000 | 2.599634000000  | 0.000000000000  |
| H  | 0.304547000000  | 0.932528000000  | 1.045625000000  |
| H  | 0.304547000000  | 0.932528000000  | -1.045625000000 |

**(NaBH<sub>3</sub>)<sup>-</sup> (singlet)**

**PBEQIDH/aug-cc-pVTZ=-188.625955370**

|    |                 |                 |                 |
|----|-----------------|-----------------|-----------------|
| B  | 0.000000000000  | 0.000000000000  | -2.346728000000 |
| H  | 0.000000000000  | 1.197683000000  | -2.443839000000 |
| H  | 1.037224000000  | -0.598842000000 | -2.443839000000 |
| H  | -1.037224000000 | -0.598842000000 | -2.443839000000 |
| Na | 0.000000000000  | 0.000000000000  | 0.419173000000  |

**(NaBH<sub>3</sub>)<sup>-</sup> (singlet open shell)**

**PBEQIDH/aug-cc-pVTZ=-188.638984729**

|    |                 |                 |                 |
|----|-----------------|-----------------|-----------------|
| B  | 0.000000000000  | 0.000000000000  | -1.539076000000 |
| H  | 0.000000000000  | 1.201738000000  | -1.629689000000 |
| H  | 1.040736000000  | -0.600869000000 | -1.629689000000 |
| H  | -1.040736000000 | -0.600869000000 | -1.629689000000 |
| Na | 0.000000000000  | 0.000000000000  | 1.144041000000  |

**(NaBH<sub>3</sub>)<sup>-</sup> (triplet)**

**PBEQIDH/aug-cc-pVTZ=-188.636176988**

|    |                 |                 |                 |
|----|-----------------|-----------------|-----------------|
| Na | -0.014341000000 | -1.071605000000 | 0.000000000000  |
| B  | -0.014341000000 | 1.463522000000  | 0.000000000000  |
| H  | -0.346935000000 | 2.613452000000  | 0.000000000000  |
| H  | 0.288198000000  | 0.928298000000  | 1.044415000000  |
| H  | 0.288198000000  | 0.928298000000  | -1.044415000000 |

**BH<sub>4</sub><sup>-</sup> (singlet)**

**CCSD(T)/aug-cc-pVTZ=-27.18622393**

|   |                |                |                |
|---|----------------|----------------|----------------|
| B | 0.000000000000 | 0.000000000000 | 0.000000000000 |
| H | 0.7157131235   | -0.7157147295  | 0.7157076109   |
| H | -0.7157131235  | -0.7157147295  | -0.7157076109  |
| H | 0.7157131235   | 0.7157147295   | -0.7157076109  |
| H | -0.7157131235  | 0.7157147295   | 0.7157076109   |

**BH<sub>4</sub><sup>-</sup> (singlet)**

**BP86/aug-cc-pVTZ=-27.2676258336**

|   |                 |                 |                 |
|---|-----------------|-----------------|-----------------|
| B | 0.000000000000  | 0.000000000000  | 0.000000000000  |
| H | 0.718398000000  | 0.718398000000  | 0.718398000000  |
| H | -0.718398000000 | -0.718398000000 | 0.718398000000  |
| H | 0.718398000000  | -0.718398000000 | -0.718398000000 |
| H | -0.718398000000 | 0.718398000000  | -0.718398000000 |

**NH<sub>3</sub>BH<sub>3</sub> (singlet)**

**CCSD(T)/aug-cc-pVTZ=-83.06925736**

|   |                |               |               |
|---|----------------|---------------|---------------|
| B | 0.000000000000 | -0.0000007171 | -0.9301897150 |
| H | 0.000000000000 | -1.1711067261 | -1.2384681895 |
| H | -1.0142082651  | 0.5855531494  | -1.2384640811 |
| H | 1.0142082651   | 0.5855531494  | -1.2384640811 |
| N | 0.000000000000 | 0.0000007165  | 0.7271834455  |
| H | 0.000000000000 | 0.9483619775  | 1.0908516642  |
| H | 0.8213048616   | -0.4741797749 | 1.0908519784  |
| H | -0.8213048616  | -0.4741797749 | 1.0908519784  |

**NH<sub>3</sub>BH<sub>3</sub> (singlet)**

**BP86/aug-cc-pVTZ=-83.2452374668**

|   |                |                 |                 |
|---|----------------|-----------------|-----------------|
| B | 0.000000000000 | 0.000000000000  | -0.929419000000 |
| H | 0.000000000000 | -1.174637000000 | -1.245804000000 |

|   |                 |                 |                 |
|---|-----------------|-----------------|-----------------|
| H | -1.017266000000 | 0.587319000000  | -1.245804000000 |
| H | 1.017266000000  | 0.587319000000  | -1.245804000000 |
| N | 0.000000000000  | 0.000000000000  | 0.727254000000  |
| H | 0.000000000000  | 0.954215000000  | 1.097910000000  |
| H | 0.826374000000  | -0.477107000000 | 1.097910000000  |
| H | -0.826374000000 | -0.477107000000 | 1.097910000000  |

**NH<sub>3</sub> (singlet)**

**CCSD(T)/aug-cc-pVTZ= -56.48056266**

|   |                |               |              |
|---|----------------|---------------|--------------|
| N | 0.000000000000 | 0.0000007210  | 0.7100049157 |
| H | 0.000000000000 | 0.9383598235  | 1.0965778407 |
| H | 0.8126427463   | -0.4691787001 | 1.0965781550 |
| H | -0.8126427463  | -0.4691787001 | 1.0965781550 |

**NH<sub>3</sub><sup>+</sup> (doublet)**

**CCSD(T)/aug-cc-pVTZ= -56.10762839**

|   |                |               |              |
|---|----------------|---------------|--------------|
| N | 0.000000000000 | -0.0000120877 | 0.9999332537 |
| H | 0.000000000000 | 1.0230529043  | 0.9999391786 |
| H | 0.8859667828   | -0.5115188362 | 0.9999333171 |
| H | -0.8859667828  | -0.5115188362 | 0.9999333171 |

**BH<sub>3</sub> (singlet)**

**CCSD(T)/aug-cc-pVTZ= -26.53908172**

|   |                |               |               |
|---|----------------|---------------|---------------|
| B | 0.000000000000 | -0.0000002394 | -1.6722236294 |
| H | 0.000000000000 | 1.1913845751  | -1.6722227988 |
| H | 1.0317694769   | -0.5956926678 | -1.6722227859 |
| H | -1.0317694769  | -0.5956926678 | -1.6722227859 |

**BH<sub>3</sub> (Doublet)**

**CCSD(T)/aug-cc-pVTZ= -26.53606725**

|   |               |               |               |
|---|---------------|---------------|---------------|
| B | 0.0064960229  | 0.0093291630  | -1.5777719917 |
| H | -0.0200886138 | 1.2139548533  | -1.4574325077 |
| H | 1.0663182997  | -0.5764357775 | -1.5748579428 |
| H | -1.0272057470 | -0.6092393683 | -1.7014255753 |



## References

- [1] (a) A. D. Becke, *Phys. Rev. A* **1988**, *38*, 3098-3100; (b) J. P. Perdew, *Phys. Rev. B* **1986**, *33*, 8822-8824.
- [2] C. Adamo, V. Barone, *J. Chem. Phys.* **1999**, *110*, 6158-6170.
- [3] (a) A. D. Becke, *J. Chem. Phys.* **1993**, *98*, 5648-5652; (b) C. Lee, W. Yang, R. G. Parr, *Phys. Rev. B* **1988**, *37*, 785-789.
- [4] J. M. Tao, J. P. Perdew, V. N. Staroverov, G. E. Scuseria, *Phys. Rev. Lett.* **2003**, *91*, 146401-146404.
- [5] Y. Zhao, D. G. Truhlar, *J. Chem. Phys.* **2006**, *125*.
- [6] X. Xu, W. A. Goddard, *Proc. Natl. Acad. Sci. U.S.A.* **2004**, *101*, 2673-2677.
- [7] M. Ernzerhof, G. E. Scuseria, *J. Chem. Phys.* **1999**, *110*, 5029-5036.
- [8] C. Adamo, V. Barone, *J. Chem. Phys.* **1998**, *108*, 664-675.
- [9] A. D. Becke, *J. Chem. Phys.* **1993**, *98*, 1372-1377.
- [10] (a) V. N. Staroverov, G. E. Scuseria, J. M. Tao, J. P. Perdew, *J. Chem. Phys.* **2003**, *119*, 12129-12137; (b) V. N. Staroverov, G. E. Scuseria, J. M. Tao, J. P. Perdew, *J. Chem. Phys.* **2004**, *121*, 11507-11507.
- [11] Y. Zhao, D. G. Truhlar, *Theo. Chem. Acc.* **2008**, *120*, 215-241.
- [12] T. Yanai, D. P. Tew, N. C. Handy, *Chem. Phys. Lett.* **2004**, *393*, 51-57.
- [13] J.-D. Chai, M. Head-Gordon, *J. Chem. Phys.* **2008**, *128*, 084106.
- [14] S. Grimme, *J. Chem. Phys.* **2006**, *124*.
- [15] T. Schwabe, S. Grimme, *Phys. Chem. Chem. Phys.* **2006**, *8*, 4398-4401.
- [16] E. Brémond, C. Adamo, *J. Chem. Phys.* **2011**, *135*, 024106.
- [17] É. Brémond, J. C. Sancho-García, Á. J. Pérez-Jiménez, C. Adamo, *J. Chem. Phys.* **2014**, *141*, 031101.
- [18] (a) T. H. Dunning Jr, *J. Chem. Phys.* **1989**, *90*, 1007-1023; (b) R. A. Kendall, T. H. Dunning, R. J. Harrison, *J. Chem. Phys.* **1992**, *96*, 6796-6806; (c) D. E. Woon, T. H. Dunning Jr, *J. Chem. Phys.* **1993**, *98*, 1358-1371; (d) D. E. Woon, T. H. Dunning Jr, *J. Chem. Phys.* **1994**, *100*, 2975-2988.
- [19] M. J. Frisch, G. W. Trucks, H. B. Schlegel, G. E. Scuseria, M. A. Robb, J. R. Cheeseman, G. Scalmani, V. Barone, G. A. Petersson, H. Nakatsuji, X. Li, M. Caricato, A. V. Marenich, J. Bloino, B. G. Janesko, R. Gomperts, B. Mennucci, H. P. Hratchian, J. V. Ortiz, A. F. Izmaylov, J. L. Sonnenberg, D. Williams-Young, F. Ding, F. Lipparini, F. Egidi, J. Goings, B. Peng, A. Petrone, T. Henderson, D. Ranasinghe, V. G. Zakrzewski, J. Gao, N. Rega, G. Zheng, W. Liang, M. Hada, M. Ehara, K. Toyota, R. Fukuda, J. Hasegawa, M. Ishida, T. Nakajima, Y. Honda, O. Kitao, H. Nakai, T. Vreven, K. Throssell, J. J. A. Montgomery, J. E. Peralta, F. Ogliaro, M. J. Bearpark, J. J. Heyd, E. N. Brothers, K. N. Kudin, V. N. Staroverov, T. A. Keith, R. Kobayashi, J. Normand, K. Raghavachari, A. P. Rendell, J. C. Burant, S. S. Iyengar, J. Tomasi, M. Cossi, J. M. Millam, M. Klene, C. Adamo, R. Cammi, J. W. Ochterski, R. L. Martin, K. Morokuma, O. Farkas, J. B. Foresman, D. J. Fox, Gaussian 16, Revision C.01. Gaussian, Inc., Wallingford CT, **2019**.
- [20] C. Y. Peng, P. Y. Ayala, H. B. Schlegel, M. J. Frisch, *J. Comp. Chem.* **1996**, *17*, 49-56.
- [21] J. W. McIver, Komornic.A, *J. Am. Chem. Soc.* **1972**, *94*, 2625-2633.
- [22] P. W. Atkins, J. De Paula, *Physical Chemistry. 8th ed.*, Oxford: Oxford University Press, New York, **2006**.
- [23] H.-J. Werner, P. J. Knowles, G. Knizia, F. R. Manby, M. Schütz, P. Celani, T. Korona, R. Lindh, A. Mitrushenkov, G. Rauhut, K. R. Shamasundar, T. B. Adler, R. D. Amos, A. Bernhardsson, A. Berning, D. L. Cooper, M. J. O. Deegan, A. J. Dobbyn, F. Eckert, E. Goll, C. Hampel, A. Hesselmann, G. Hetzer, T. Hrenar, G. Jansen, C. Köppl, Y. Liu, A. W. Lloyd, R. A. Mata, A. J. May, S. J. McNicholas, W. Meyer, M. E. Mura, A. Nicklass, D. P. O'Neill, P. Palmieri, D. Peng,

- K. Pflüger, R. Pitzer, M. Reiher, T. Shiozaki, H. Stoll, A. J. Stone, R. Tarroni, T. Thorsteinsson, M. Wang, <http://www.molpro.net>, **2012**.
- [24] T. Shiozaki, *WIREs Computational Molecular Science* **2018**, 8, e1331.
- [25] O. Tishchenko, J. Zheng, D. G. Truhlar, *J. Chem. Theory Comput.* **2008**, 4, 1208-1219.
- [26] Q. Sun, T. C. Berkelbach, N. S. Blunt, G. H. Booth, S. Guo, Z. Li, J. Liu, J. D. McClain, E. R. Sayfutyarova, S. Sharma, S. Wouters, G. K.-L. Chan, *WIREs Computational Molecular Science* **2018**, 8, e1340.
- [27] P. Salvador, E. Ramos-Cordoba, Universitat de Girona, Girona, Spain, **2012**.
- [28] G. te Velde, F. M. Bickelhaupt, E. J. Baerends, C. Fonseca Guerra, S. J. A. van Gisbergen, J. G. Snijders, T. Ziegler, *J. Comp. Chem.* **2001**, 22, 931-967.
- [29] J. Krijn, E. J. Baerends, *Fit Functions in the HFS-Method* **1984**.
- [30] E. Van Lenthe, E. J. Baerends, J. G. Snijders, *J. Chem. Phys.* **1993**, 99, 4597-4610.
- [31] V. Bachler, G. Olbrich, F. Neese, K. Wieghardt, *Inorg. Chem.* **2002**, 41, 4179-4193.
